# Supplementary material for: A forecasting model for dengue incidence in the District of Gampaha, Sri Lanka
Source: PubMed Central journal article supplement (PMC5916713; doi:10.1186/s13071-018-2828-2), 2018-04-24

**Histogram of M2.1\$residuals**

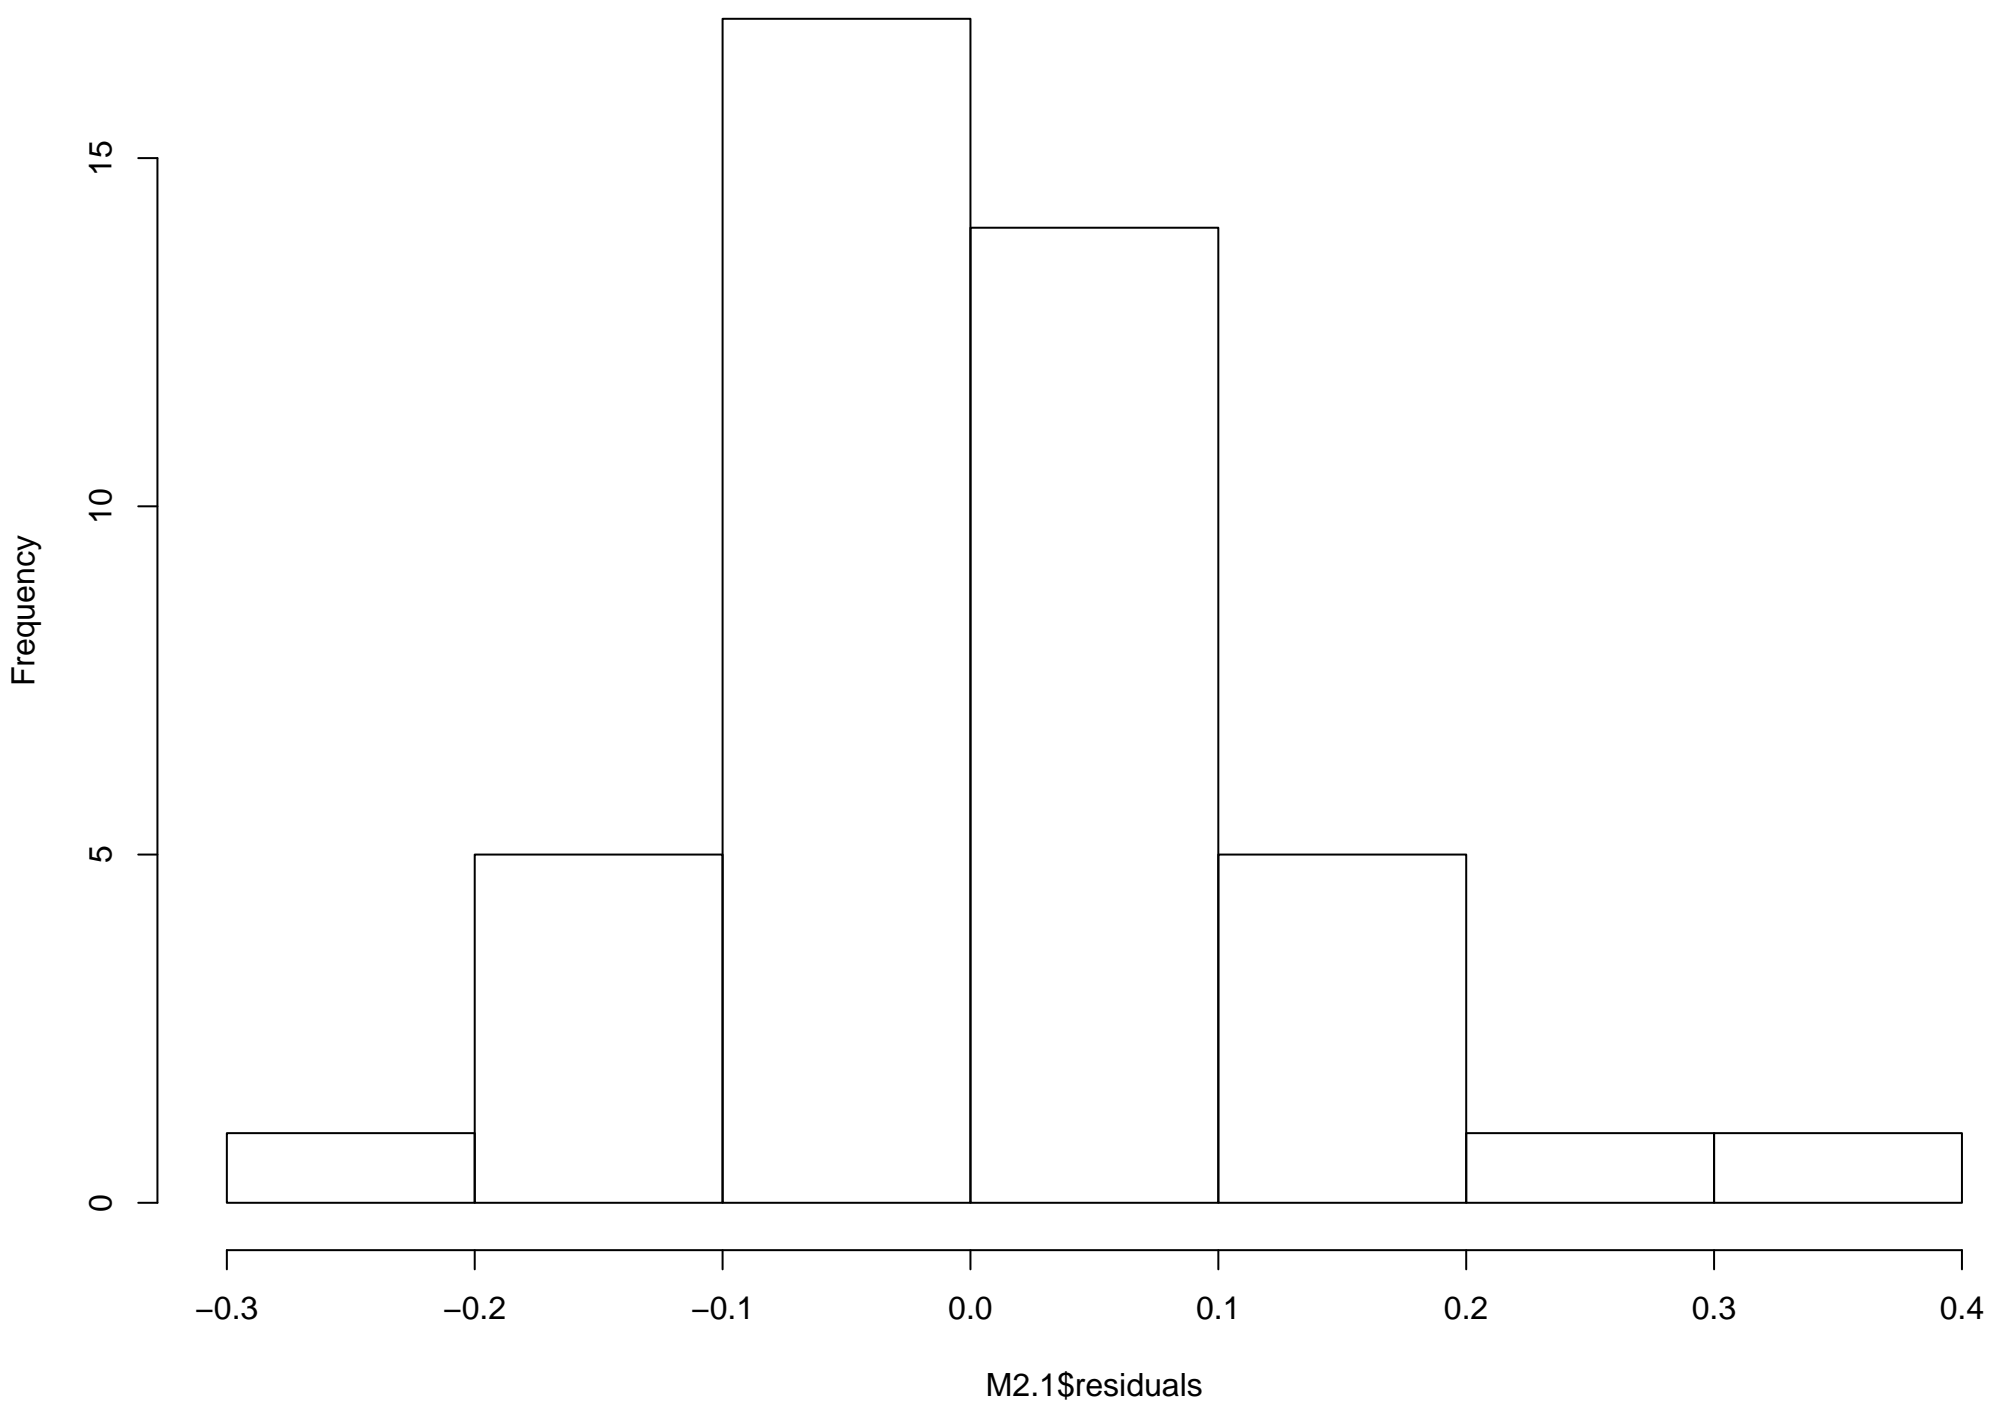

Supplement: 13071_2018_2828_MOESM2_ESM.pdf [file 13071_2018_2828_MOESM2_ESM.pdf]
